# Supplementary material for: Vagus Nerve Stimulation Improves Mitochondrial Dysfunction in Post–cardiac Arrest Syndrome in the Asphyxial Cardiac Arrest Model in Rats
Source: Frontiers journal article supplement (doi:10.3389/fnins.2022.762007), 2022-05-26
Supplement: Data_Sheet_1.pdf [file Data_Sheet_1.pdf]

Supplementary Data for

## Vagus nerve stimulation improves mitochondrial dysfunction in post-cardiac arrest syndrome in the asphyxial cardiac arrest model in rats

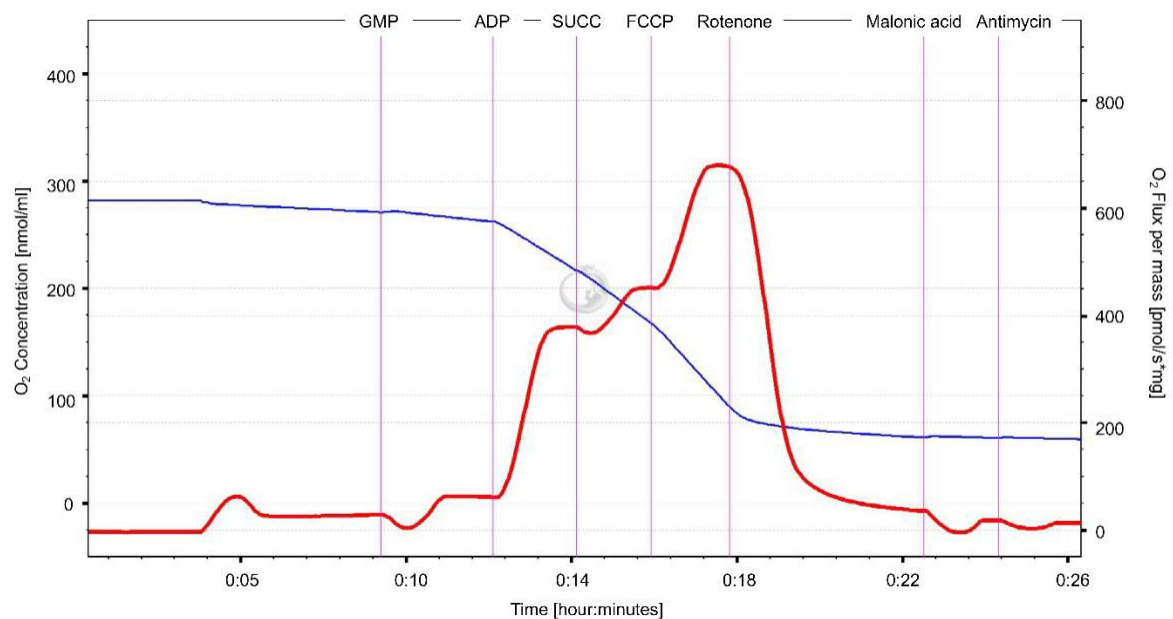

**Supplementary Figure 1.** Representative images of the SUIT protocol performed with high-resolution respirometry (OROBOROS). The blue line denotes the oxygen concentration (nmol/ml, left scale), and the red line indicates the oxygen flux in mass (pmol/s\*mg, right scale). Reagents (upper scale) were added at the time (lower scale). GMP, glutamate, malate, pyruvate; ADP, adenosine diphosphate; SUCC, succinate; FCCP, carbonyl cyanide 4-(trifluoromethoxy) phenylhydrazone.

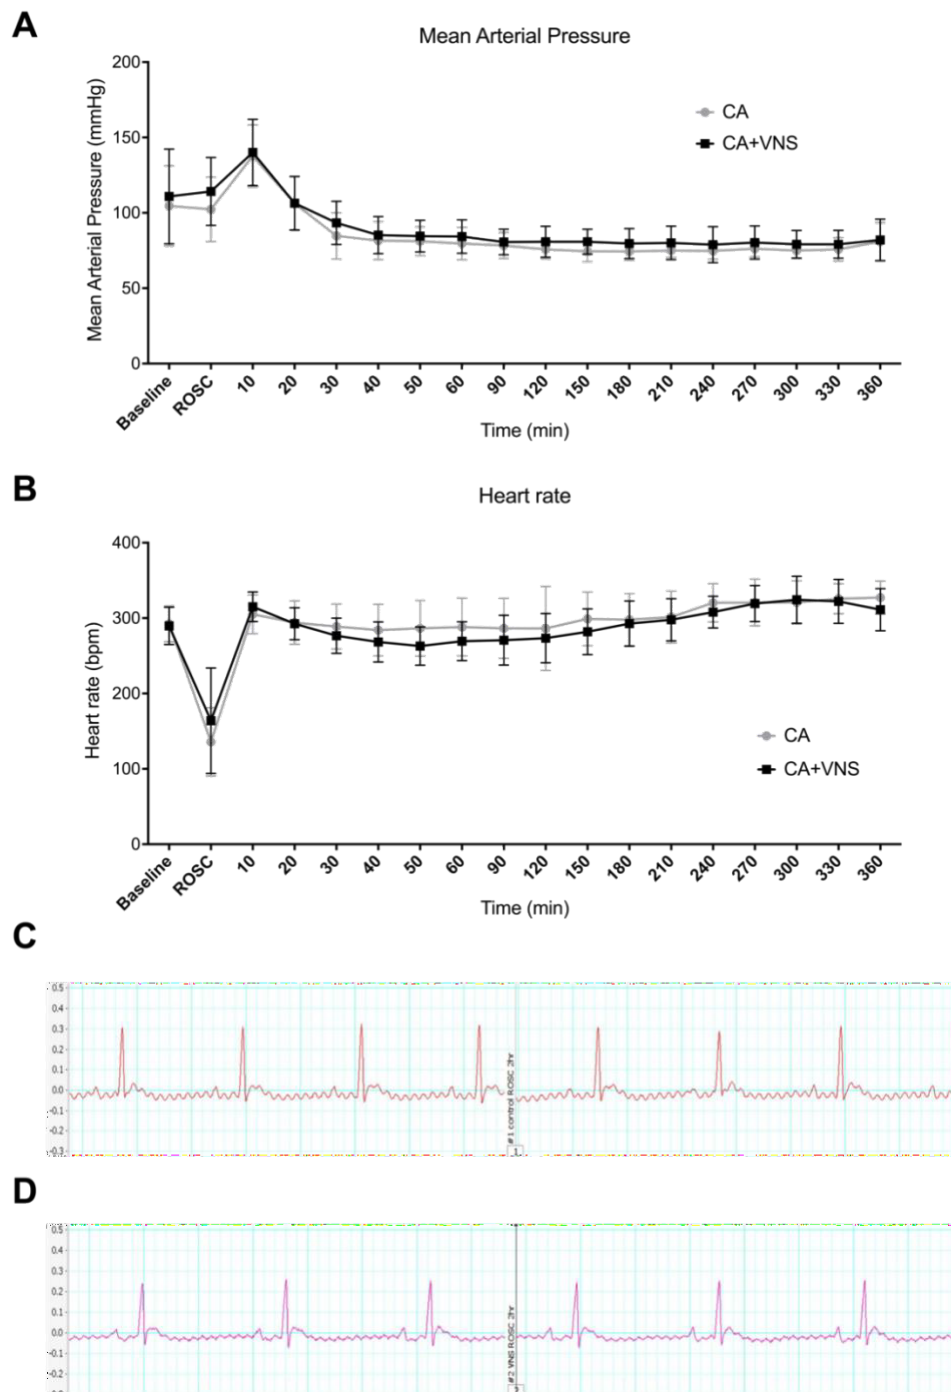

**Supplementary Figure 2.** Trends of hemodynamic variables from baseline to 6 hours after ROSC. (A) Trends of mean arterial pressure.  $p < 0.0001$  between times,  $p = 0.0701$  between groups,  $p = 0.9914$  between times  $\times$  groups; mixed-effects model. There was no significant difference in post hoc Bonferroni's multiple comparisons test. (B) Trends of heart rate.  $p < 0.0001$  between times,  $p = 0.6053$  between groups,  $p = 0.0234$  between times  $\times$  groups; mixed-effects model. There was no significant difference in post hoc Bonferroni's multiple comparisons test. Data are presented as the mean and standard deviation. Representative electrocardiography at 2 hours after the ROSC period in the (C) CA group and (D) CA+VNS group. One small square indicates 0.02 seconds, and the heart rate was recorded as 275 and 227 beats per minute, respectively.

**Supplementary Table 1.** Comparison of heart rate variables during experimental period.

| Variables | CA (n=28)     | CA+VNS (n=26) | <i>p value</i> |
|-----------|---------------|---------------|----------------|
| Baseline  | 290 [274-314] | 285 [271-316] | 0.7341         |
| ROSC      | 128 [96-165]  | 134 [116-246] | 0.3034         |
| 30 min    | 286 [261-314] | 277 [258-292] | 0.1886         |
| 60 min    | 287 [259-324] | 267 [254-284] | 0.1214         |
| 90 min    | 293 [259-325] | 265 [245-293] | 0.0783         |
| 120 min   | 306 [260-327] | 267 [252-302] | 0.0859         |
| 150 min   | 312 [266-350] | 281 [264-308] | 0.0961         |
| 180 min   | 303 [273-332] | 297 [275-314] | 0.6414         |

Variables are presented with median [IQR].
